# Supplementary material for: Molecular Characterization and Phylogenetic Analysis of the Pine Tortoise Scale Insect Toumeyella parvicornis (Cockerell) (Hemiptera: Coccidae)
Source: MDPI journal article supplement (doi:10.3390/f14081585), 2023-08-03

Figure S3: MrBayes phylogenetic tree of the wingless gene among the Coccidae family and *T. parvicornis*. The numbers in the branch labels indicate the percentage of Bayesian posterior probability.

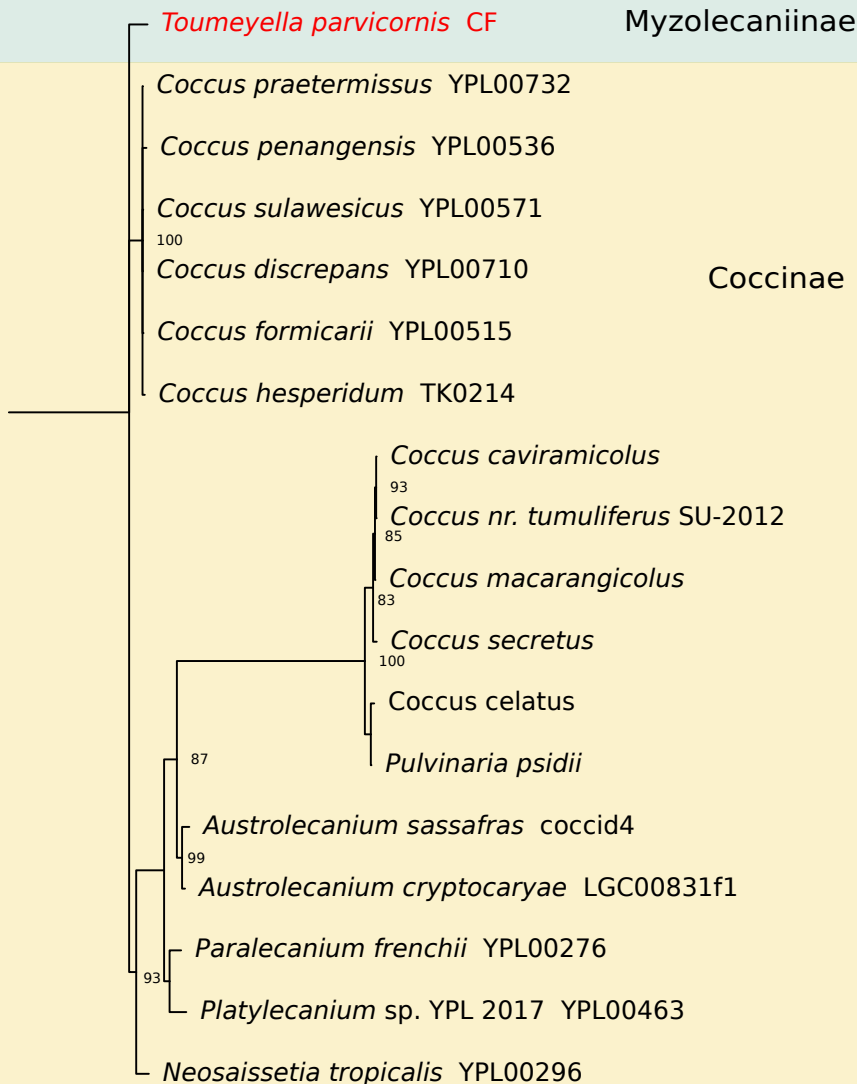

Supplement: s1 [file s1]
