# Supplementary material for: Molecular Characterization and Phylogenetic Analysis of the Pine Tortoise Scale Insect Toumeyella parvicornis (Cockerell) (Hemiptera: Coccidae)
Source: MDPI journal article supplement (doi:10.3390/f14081585), 2023-08-03
Supplement: s1 [file s1]

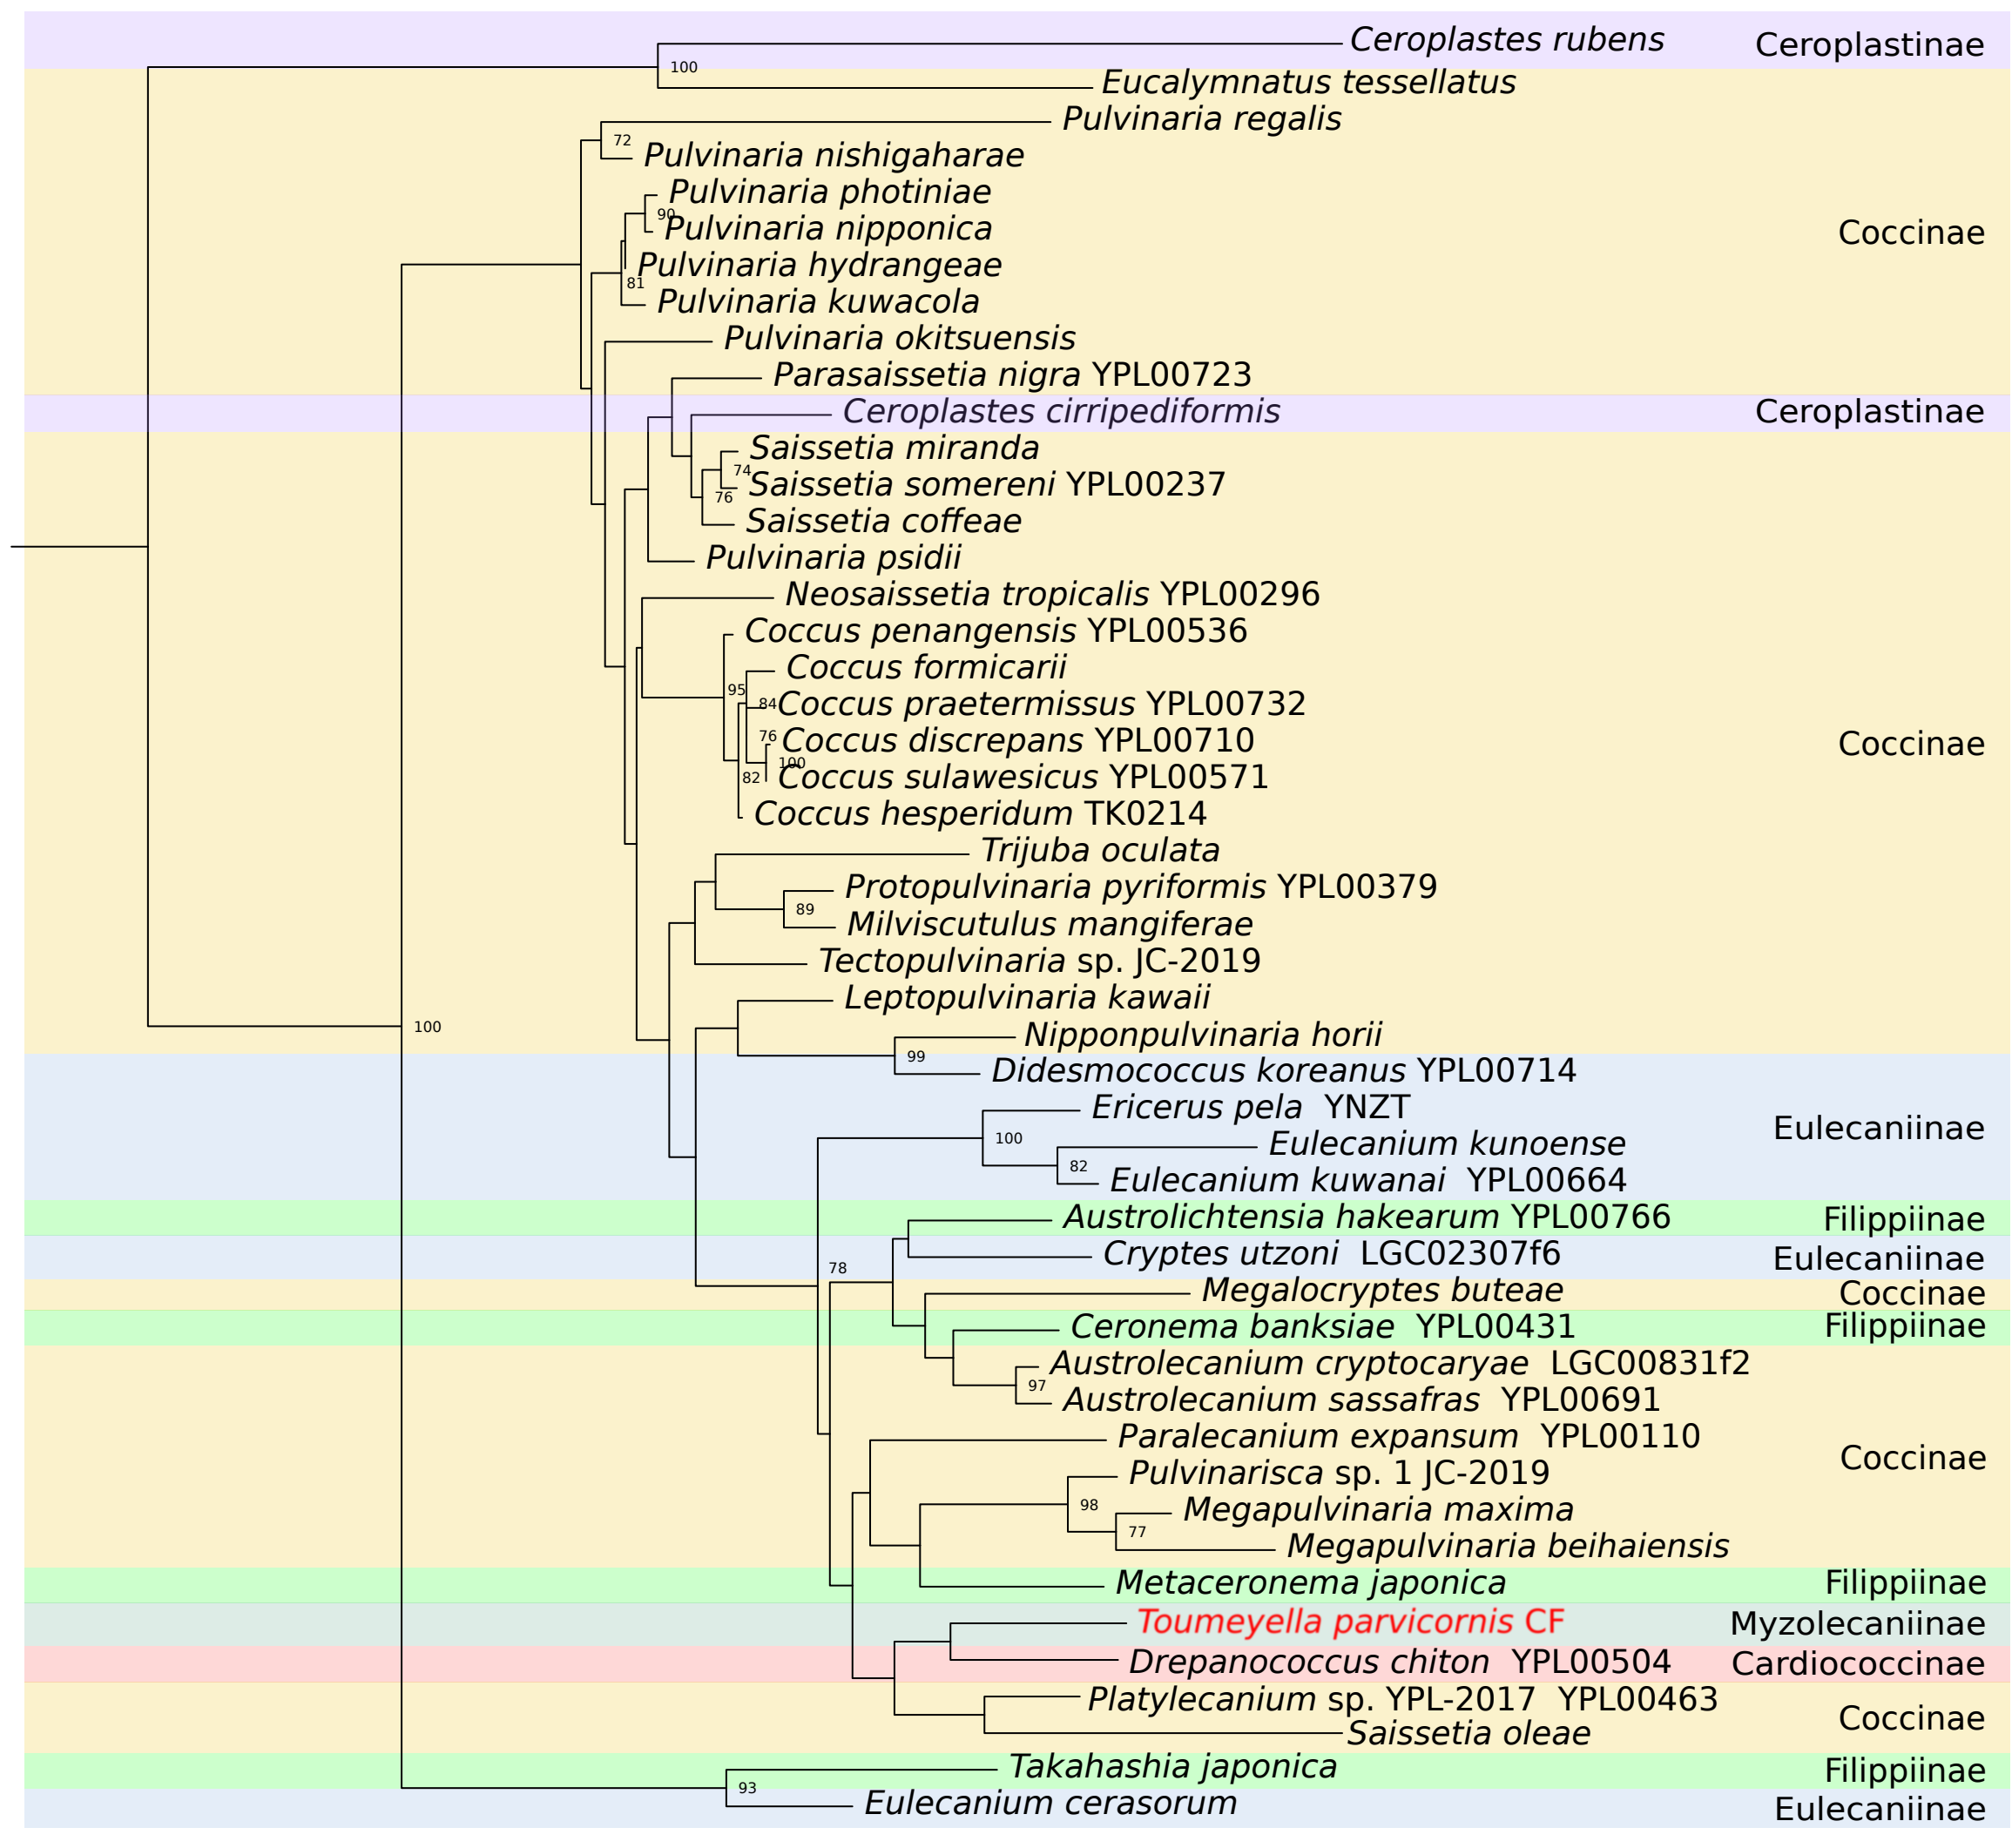

Figure S5: RAxML phylogenetic tree of the elongation factor EF-1 $\alpha$  gene among the Coccidae family. Colors indicate the morphological subfamilies: Eulecaniinae, Filippiinae, Coccinae, Cardiococcinae, Ceroplastinae, Eriopeltinae, and Myzolecaniinae, to which *T. parvicornis* belongs. In red is the Italian isolate of *T. parvicornis*. The numbers in the branch labels indicate the bootstrap values.
